# Supplementary material for: Coccoloba alnifoliaLeaf Extract as a Potential Antioxidant Molecule Using In Vitro and In Vivo Assays
Source: Hindawi journal article supplement (doi:10.1155/2020/3928706), 2020-10-10
Supplement: f1 [file 3928706.f1.pdf]

**Sup Table 1** - Pearson Correlation that was calculated considering the values obtained with antioxidant assays and sugar or to protein or to phenolic compounds

|         | <b>SUGAR</b> | TAC         | DPPH  | Superoxide | Reducing Power |
|---------|--------------|-------------|-------|------------|----------------|
| CE      | 3.3          | 23.82       | 75.98 | 37.34      | 42.10          |
| HE      | 3.4          | 11.03       | 78.43 | 77.48      | 16.18          |
| WEE     | 12.9         | 55.38       | 84.64 | 75.06      | 99.56          |
| EE      | 18.4         | 87.32       | 87.58 | 81.86      | 112.72         |
| WE      | 19.9         | 40.67       | 68.14 | 75.06      | 108.33         |
| ME      | 22.5         | 102.15      | 83.33 | 81.78      | 117.25         |
| PEARSON |              | <b>0.83</b> | 0.15  | 0.63       | <b>0.95</b>    |

|         | <b>PROTEIN</b> | TAC         | DPPH  | Superoxide | Reducing Power |
|---------|----------------|-------------|-------|------------|----------------|
| CE      | 0.1            | 23.82       | 75.98 | 37.34      | 42.10          |
| HE      | 0.1            | 11.03       | 78.43 | 77.48      | 16.18          |
| WEE     | 0.2            | 55.38       | 84.64 | 75.06      | 99.56          |
| EE      | 0.3            | 87.32       | 87.58 | 81.86      | 112.72         |
| WE      | 0.4            | 40.67       | 68.14 | 75.06      | 108.33         |
| ME      | 0.5            | 102.15      | 83.33 | 81.78      | 117.25         |
| PEARSON |                | <b>0.78</b> | 0.01  | 0.55       | <b>0.84</b>    |

|         | <b>PHENOLIC COMPOUNDS</b> | TAC         | DPPH  | Superoxide | Reducing Power |
|---------|---------------------------|-------------|-------|------------|----------------|
| CE      | 0.23                      | 23.82       | 75.98 | 37.34      | 42.10          |
| HE      | 1.05                      | 11.03       | 78.43 | 77.48      | 16.18          |
| WEE     | 1.77                      | 55.38       | 84.64 | 75.06      | 99.56          |
| EE      | 3.36                      | 87.32       | 87.58 | 81.86      | 112.72         |
| WE      | 4.5                       | 40.67       | 68.14 | 75.06      | 108.33         |
| ME      | 6.13                      | 102.15      | 83.33 | 81.78      | 117.25         |
| PEARSON |                           | <b>0.77</b> | 0.05  | 0.63       | <b>0.79</b>    |

Legend: very strong 0.9 or more; strong 0.7 to 0.9; moderate 0.5 to 0.7; weak 0.3 to 0.5; insignificant 0 to 0.3.

The supplementary Table 1 shown the Pearson coefficient analyzes for sugar, protein and phenolic compounds presented in each of the *Coccoloba alnifolia* extracts. It red it was shown the values obtained and it was considered a very strong correlation values higher than 0.9, strong correlation values from 0.7 to 0.9. The Pearson coefficient analyzes showed a positive correlation between the phenolic compounds content of the *Coccoloba*

*alnifolia* extract and the antioxidant assay. There was a strong correlation between TAC and Reducing Power Assay, and a moderate correlation to Superoxide Radical Scavenging. Furthermore, the sugars content presented a very strong correlation for Reducing Power Assay and TAC and a moderate correlation with Superoxide Radical Scavenging.
